# Supplementary material for: Branched double-shelled TiO2 nanotube networks on transparent conducting oxide substrates for dye sensitized solar cells
Source: Royal Society of Chemistry journal article supplement (doi:10.1039/c2jm34574a), 2012-01-01
Supplement: c2jm34574a.pdf [file c2jm34574a.pdf]

**Supporting information:**

**Branched double-shelled TiO<sub>2</sub> Nanotube Networks on  
Transparent Conducting Oxide Substrates for Dye  
Sensitized Solar Cells**

*Jijun Qiu,<sup>a,b</sup> Xiaomin Li,<sup>\*b</sup> Xiangdong Gao,<sup>b</sup> Xiaoyan Gan,<sup>b</sup> Binbin Weng,<sup>a</sup> Lin Li,<sup>a</sup>  
Zijian Yuan,<sup>a</sup> Zhisheng Shi<sup>\*a</sup> and Yoon-Hwae Hwang<sup>c</sup>*

<sup>a</sup> School of Electrical and Computer Engineering, University of Oklahoma, Norman, Oklahoma 73019, USA.

<sup>b</sup> State Key Laboratory of High Performance Ceramics and Superfine Microstructures, Shanghai Institute of Ceramics, Chinese Academy of Sciences, Shanghai 200050, China

<sup>c</sup> Department of Nanomaterials Engineering & BK 21 Nano Fusion Technology Division, Pusan National University, Miryang 627-706, Korea

**Contents:**

**Figure S1** shows the growth direction of ZnO branches.

**Figure S2** shows a narrow diameter distribution of ZnO branches.

**Figure S3** shows a scattering effect at top of 1D TiO<sub>2</sub> nanotube arrays and 3D TiO<sub>2</sub> nanotube networks.

**Figure S4** shows the connection between TiO<sub>2</sub> nanotubal stems and the FTO substrate before LbL-AR deposition.

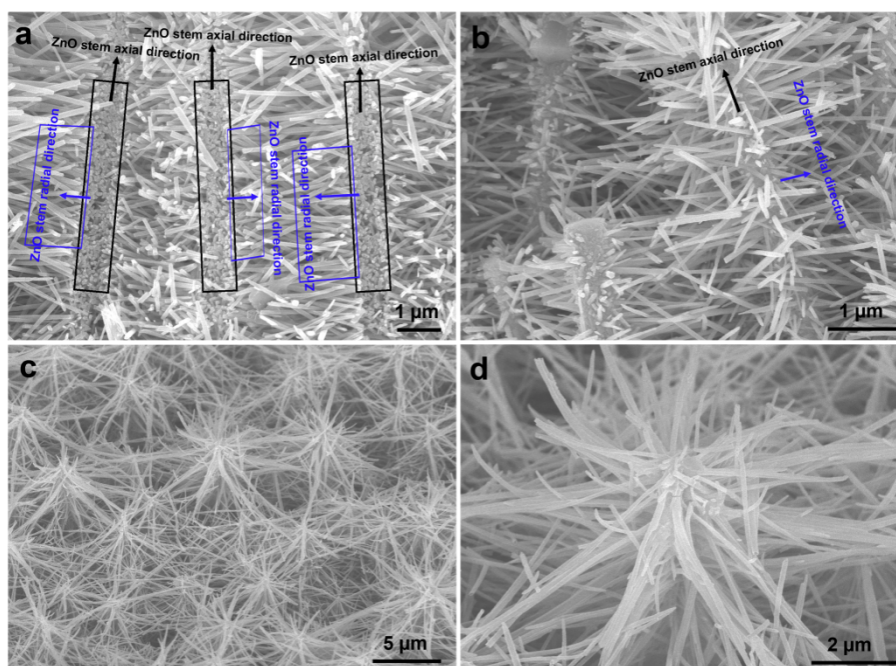

Figure S1 Side-view FESEM ZnO branches a) without and b) with ZnO stems. Tiled top-view FESEM images of TiO<sub>2</sub> 3D NTN with c) low and d) high magnification

Figure S1 a shows a typical FESEM images of ZnO branches without ZnO stems, which had been peeled during the cutting process. Only transverse section profiles of ZnO branches' bottoms could be observed in the axial direction of ZnO stems (as indicated by black rectangles in Figure S1 a), and the ZnO nanowires are parallel or thereabout in the radial direction of ZnO stems (as indicated by the blue rectangles), indicating a little angle between ZnO braches and stems. Same phenomena also could be observed in the FESEM image of ZnO branches grown from ZnO stems, as shown in Figure S1 b. Tiled top-view FESEM image of TiO<sub>2</sub> nanotube networks with different magnification, as shown in Figure S1 c and d, also show that TiO<sub>2</sub> nanotubal branches are perpendicular to the TiO<sub>2</sub> tubal stems, indicating vertical growth direction of ZnO branches.

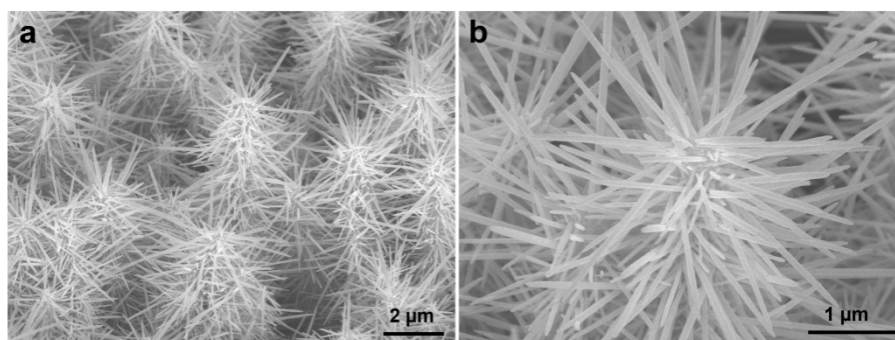

Figure S2 Tiled top-view of branched ZnO template with a) low and b) high magnification.

Large size FESEM images of ZnO branches in Figure S2 shows that the different in diameter of branches is very small. At the same time, TiO<sub>2</sub> nanotubal branches also show a very narrow diameter distribution, as shown in Figure S1 c and d, indicating a uniform diameter of ZnO branch templates.

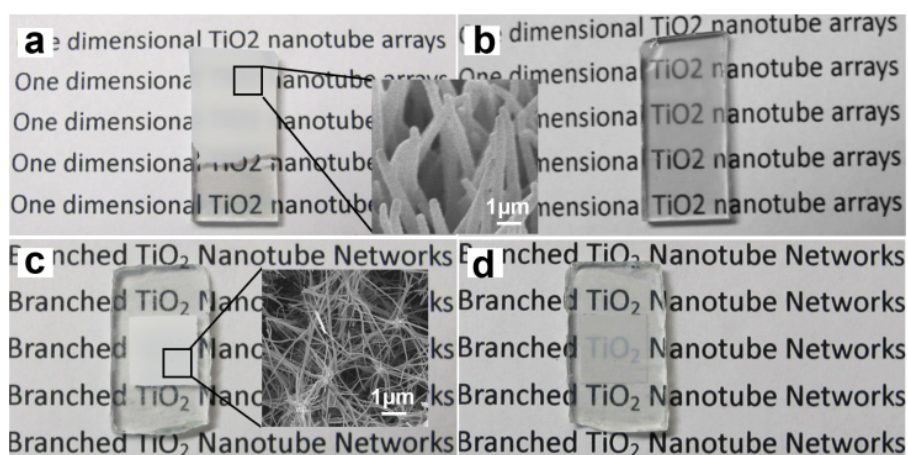

Figure S3 Photograph of the prepared one 1D TiO<sub>2</sub> nanotube array and 3D branched TiO<sub>2</sub> nanotube networks on FTO substrates. (a) top- and (b) back- view of 1D TiO<sub>2</sub> nanotube arrays; (c) top-and (d) back-view of 3D TiO<sub>2</sub> nanotube networks.

Figure S3 shows the real photo-images of TiO<sub>2</sub> nanotubal arrays and networks taken from front and back sides. An obvious transparent difference between front and back views could be observed from Figure S1c and S3d, indicating a strong scattering effect at the top surface of 3D branched TiO<sub>2</sub> nanotube networks. However, the 1D TiO<sub>2</sub> nanotube arrays also shows a scattering effect in Figure S3a and S3b. Therefore, in our opinion, the improved performance of 3D TiO<sub>2</sub> nanotube networks is mainly attributed to the increased surface areas resulted from TiO<sub>2</sub> nanotube branches with small size, rather than scattering effect.

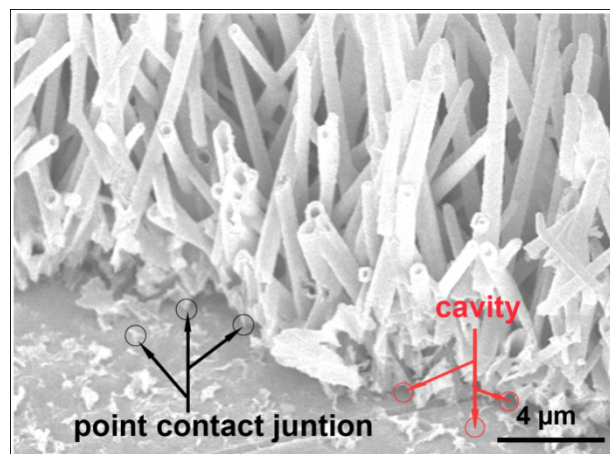

Figure S4 Tiled top-view FESEM images of double-shelled TiO<sub>2</sub> nanotubal stems.

ZnO seed layer, which connects the TiO<sub>2</sub> nanotubal stems with FTO substrates, will be etched together with ZnO stems after longer etching time for a low [Zn<sup>2+</sup>] and a high DSCs performance, forming lots of cavities or cracks in the places where were occupied by ZnO stems, as indicated by red circles in Figure S4, and the TiO<sub>2</sub> nanotubal stems connects with FTO substrate just by weak point contact junction (as indicated by black circles in Figure S4). The weak adhesion can't live through the brunt of low pH (high TiCl<sub>4</sub> concentration) and high temperature during the hot TiCl<sub>4</sub> solution treatment. Many methods have been tried to solve this problem, including using TiO<sub>2</sub> seed layer and TiO<sub>2</sub>/ZnO mixed seed layer et al. By now, only additional LBL-AR TiO<sub>2</sub> deposition can effectively prevent TiO<sub>2</sub> nanotubal stem peeling during TiCl<sub>4</sub> treatment. We believe that new LBL-AR TiO<sub>2</sub> deposition can fill the cavities and cracks with fine TiO<sub>2</sub> nanoparticles to form area contact, exceedingly enhancing the adhesion.
